# Supplementary material for: Compressed-air flow control system
Source: Royal Society of Chemistry journal article supplement (doi:10.1039/c0lc00303d), 2010-11-29
Supplement: c0lc00303d.pdf [file c0lc00303d.pdf]

## **Supplementary Information**

### **Compressed-air flow control system**

Ki Wan Bong<sup>a‡</sup>, Stephen C. Chapin<sup>a‡</sup>, Daniel C. Pregibon<sup>b</sup>, David Baah<sup>c</sup>,  
Tamara M. Floyd-Smith<sup>d</sup>, and Patrick S. Doyle<sup>a</sup>

<sup>a</sup>*Department of Chemical Engineering, Massachusetts Institute of Technology, Cambridge, MA 02139, USA.*

<sup>b</sup>*Firefly BioWorks, Inc., Cambridge, MA 02139, USA.*

<sup>c</sup>*Materials Science and Engineering Program, Tuskegee University, Tuskegee, AL 36088, USA.*

<sup>d</sup>*Department of Chemical Engineering, Tuskegee University, Tuskegee, AL 36088, USA.*

<sup>‡</sup>*Authors contributed equally to this work*

*\*e-mail: pdoyle@mit.edu*

## 1. Channel geometries

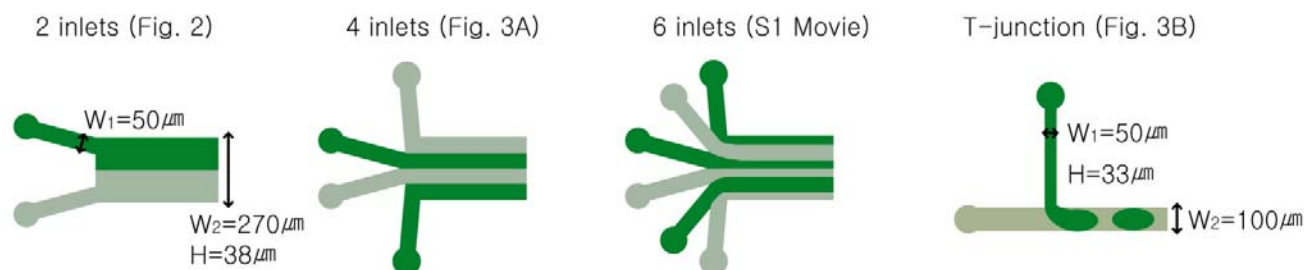

**Figure S1.** Schematic depicting the four types of channels used in this article. For the three channels generating laminar coflows, the dimensions were all identical; only the number of inlets differed.

## 2. Estimation of maximum fluid velocity

The following assumptions were made in the estimation:

1. Newtonian, incompressible, fully developed, and laminar flows
2. Negligible surface tension between solutions
3. Viscosity  $\mu$  is the same (65 cP) in all inlet flow streams.
4. Pressure drop occurs in narrow inlet channels.
5. Negligible PDMS channel deformation for  $W$  (channel width)  $\sim$   $H$  (channel height)<sup>1</sup>

### Basic Equations

For laminar flow in a pipe, the volumetric flow rate  $Q$  is given by the following equation<sup>2</sup>,

$$Q = \frac{AD_h^3}{32\mu L} (P_{\text{loss}}) \quad (1)$$

Hydraulic diameter of rectangular tubes is also given by the following equation<sup>2</sup>.

$$D_h = \frac{2ab}{a+b} \quad (2) \quad \text{where } a = \text{width of a pipe and } b = \text{height of a pipe.}$$

**Table S1.** Inlet geometry for the channel used in Fig. 2.

| Width, $W_1$     | Area, $A_1$          | Hydraulic Diameter, $D_{h,1}$ | Length, $L_1$      |
|------------------|----------------------|-------------------------------|--------------------|
| 50 $\mu\text{m}$ | 1900 $\mu\text{m}^2$ | 43 $\mu\text{m}$              | 4000 $\mu\text{m}$ |

### Equation Setup

$$2Q_{\text{inlet}} = \frac{A_2 D_{h,2}^2}{16\mu L_2} (P) = Q_t \quad (3)$$

$$U_{\text{max}} = 1.5 U_{\text{avg}} = 1.5(Q_t/A_2) = 858 \times P \text{ (}\mu\text{m/s)} \quad (4)$$

### 3. Bead Tracking

A 0.02 % solution of 1.6  $\mu\text{m}$  polystyrene beads in PEG-DA 700 was used to measure maximum fluid velocity ( $U_{\text{max}}$ ). The bead velocity was maximum in the center of the channel, and midway between the two walls. After a given pressure was applied, beads in the center of the channel were followed with a 20X microscope objective (Zeiss) with an optivar setting of 2.5X leading to effective magnifications of 50X. Movies of translating beads were taken by a CCD camera that captured images at the rate of 30 fps using an exposure time of 1/500 s. From the frame-to-frame position of beads, bead velocities were calculated using the central difference approximation.

**Table S2.** Comparison between measured and estimated  $U_{\text{max}}$ .

| P (Psi) | Measured $U_{\text{max}}$ ( $\mu\text{m/s}$ )<br>(From bead tracking) | Estimated $U_{\text{max}}$ ( $\mu\text{m/s}$ )<br>(From equation (4)) | % Deviation from<br>the estimation |
|---------|-----------------------------------------------------------------------|-----------------------------------------------------------------------|------------------------------------|
| 0.5     | 591                                                                   | 429                                                                   | 37.8 %                             |
| 1.0     | 954                                                                   | 858                                                                   | 11.1 %                             |
| 1.5     | 1344                                                                  | 1288                                                                  | 4.4 %                              |
| 2.0     | 1801                                                                  | 1717                                                                  | 4.9 %                              |
| 2.5     | 2374                                                                  | 2146                                                                  | 10.6 %                             |
| 3.0     | 2696                                                                  | 2575                                                                  | 4.7 %                              |
| 3.5     | 3252                                                                  | 3005                                                                  | 8.2 %                              |
| 4.0     | 3642                                                                  | 3434                                                                  | 6.0 %                              |

#### 4. Automation of pulsed-flow operation

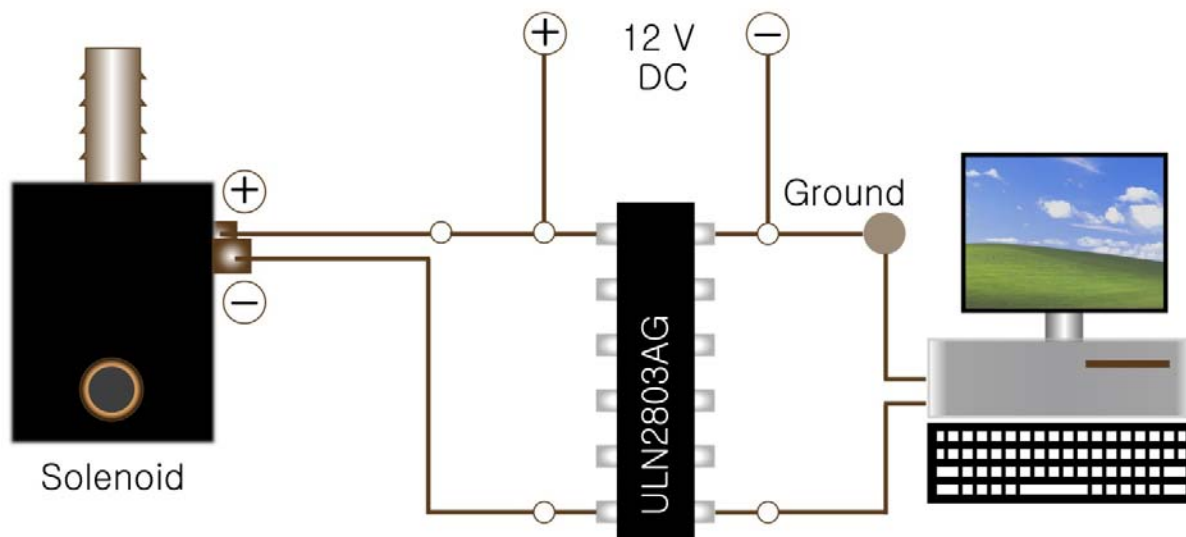

**Figure S2.** Schematic description of the electrical circuit used for automated control of the three-way solenoid valve via the parallel port connection. A simple GUI was constructed using Python to allow the user to cycle this process automatically through the specification of a flow duration and a stoppage duration.

#### 5. A python script for the automation

A sample code for the GUI used to control the solenoid valve is provided as a separate pdf file.

#### 6. Syringe Setup

In order to compare the response time of our system with that of a syringe setup, we performed additional bead tracking experiments with a two-inlet PDMS microchannel. For the syringe measurements, two Hamilton Gastight Syringes (Model 1701, 10  $\mu$ L volume) were driven on the same Harvard Apparatus PHD programmable syringe pump, with polyethylene feed tubing

(1/16" I.D. and 1/8" O.D.) connected to the device via plastic adapter units. For the data collected in Fig. 4, the syringe pump was programmed so as to alternate between 1 s of flow at a prescribed flow rate and 1 s of stoppage. For the data collected in Table 1, the syringe pump was driven at a prescribed flow rate for 10 min and then manually stopped; the time required for suspended fluorescent beads to come to a stop was measured.

## 7. Cost Estimation

**Table S3.** Cost estimation for the compressed-air flow control system. Estimates are given for versions of the system capable of controlling 2, 4, 6, or 8 streams. Marginal cost of adding an additional stream is ~\$90.

| Number of Streams         | 2             | 4             | 6               | 8               |
|---------------------------|---------------|---------------|-----------------|-----------------|
| Swagelok Needle Valves    | \$ 60.00      | \$ 120.00     | \$ 180.00       | \$ 240.00       |
| Solenoid Valve            | \$ 50.00      | \$ 50.00      | \$ 50.00        | \$ 50.00        |
| High-P Pressure Regulator | \$ 100.00     | \$ 100.00     | \$ 100.00       | \$ 100.00       |
| Low-P Pressure Regulator  | \$ 50.00      | \$ 50.00      | \$ 50.00        | \$ 50.00        |
| Digital Pressure Gauge    | \$ 260.00     | \$ 260.00     | \$ 260.00       | \$ 260.00       |
| PTFE Tape                 | \$ 5.00       | \$ 5.00       | \$ 5.00         | \$ 5.00         |
| PVC Tubing                | \$ 20.00      | \$ 20.00      | \$ 20.00        | \$ 20.00        |
| Tygon Tubing              | \$ 10.00      | \$ 10.00      | \$ 10.00        | \$ 10.00        |
| Luer Stubs                | \$ 7.20       | \$ 12.00      | \$ 16.80        | \$ 21.60        |
| Pipette Tips              | \$ 9.00       | \$ 18.00      | \$ 27.00        | \$ 36.00        |
| Plastic Syringes          | \$ 3.00       | \$ 5.00       | \$ 7.00         | \$ 9.00         |
| Circuit Components        | \$ 20.00      | \$ 20.00      | \$ 20.00        | \$ 20.00        |
| In-Line Pressure Gauges   | \$ 100.00     | \$ 200.00     | \$ 300.00       | \$ 400.00       |
| Plastic Connectors        | \$ 7.50       | \$ 13.50      | \$ 19.50        | \$ 25.50        |
| Threaded Male Connectors  | \$ 20.00      | \$ 20.00      | \$ 20.00        | \$ 20.00        |
|                           |               |               |                 |                 |
| <b>TOTAL</b>              | <b>\$ 722</b> | <b>\$ 904</b> | <b>\$ 1,085</b> | <b>\$ 1,267</b> |

**Figure S3.** Cost comparison between syringe-based and pressure-based systems. The economic advantage of the pressure-based system is particularly evident in applications that require the control of a large number of streams.

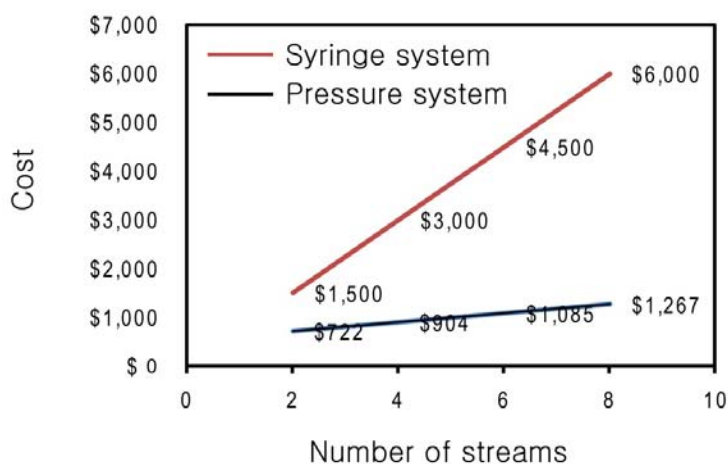

### 8. Supplementary Video 1

Real-time video showing the manipulation of six coflowing laminar streams. Channel is 38  $\mu\text{m}$  tall and 270  $\mu\text{m}$  wide. Dark streams: 30% PEG-DA, 70% food coloring. Light streams: 30% PEG-DA, 70% water.

### 9. Supplementary Video 2

Video (0.5X real-time) showing the generation of droplets of different sizes. Droplet size is modulated in a continuous fashion by the gradual closing of the relief valve connected to the dispersed-phase sample arm. Channel is 33  $\mu\text{m}$  tall and 100  $\mu\text{m}$  wide. Dispersed phase: food coloring. Continuous phase: mineral oil.

### 10. Supplementary Video 3

Real-time video showing pulsed flow operation in a compressed-air flow control system followed by pulsed flow operation with a syringe pump system. Channel is 38  $\mu\text{m}$  tall and 270  $\mu\text{m}$  wide. Stream: 0.02 % solution of 1.6  $\mu\text{m}$  polystyrene beads in PEG-DA.

## 11. References

- [1] Gervais, T., El-Ali, J., Günther, A., Jensen, K.F., *Lab Chip*. **2006**, 6, 500-507.
- [2] M. M. Denn, *Process Fluid Mechanics*, Prentice Hall, New Jersey, 1st edn., **1980**.
